# Supplementary material for: Genome-wide CRISPR screen reveals host genes that regulate SARS-CoV-2 infection
Source: PubMed Central journal article supplement — bioRxiv. 2020 Jun 17:2020.06.16.155101. Preprint. [Version 1] doi: 10.1101/2020.06.16.155101 (PMC7457610; doi:10.1101/2020.06.16.155101), 2020-06-17
Supplement: NIHPP2020.06.16.155101-supplement-1.pdf [file NIHPP2020.06.16.155101-supplement-1.pdf]

## Figure S1

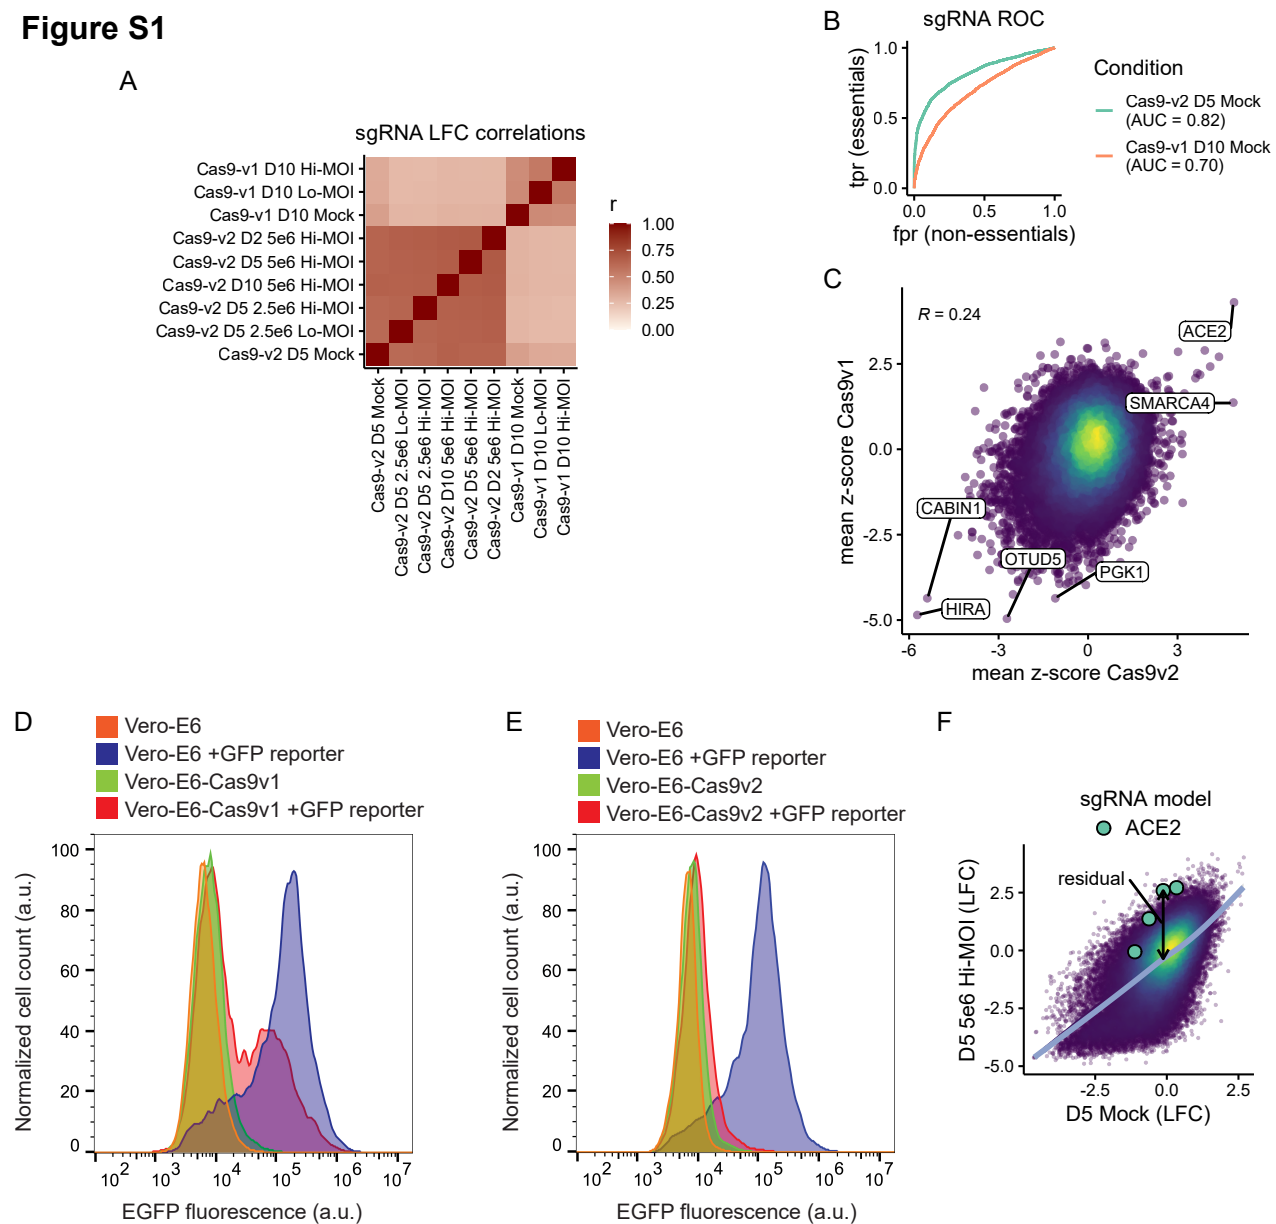

**Fig. S1. Quality control metrics for CRISPR screen.** (A) Correlation matrix depicting the Pearson correlation between the guide-level log-fold change values relative to the plasmid DNA. Cells were cultured in DMEM with 2% FBS (D2), 5% FBS (D5), 10% FBS (D10), plated at  $2.5 \times 10^6$  or  $5.0 \times 10^6$  cells per flask and infected at a MOI 0.1 (Hi) or MOI 0.01 (Lo). (B) Receiver-operator characteristic (ROC) curve for the recovery of guides targeting essential genes in the mock-treated condition of the Cas9-v1 and Cas9-v2 screens. True positives are  $n = 1,528$  essential genes ( $n = 6,178$  guides); true negative genes are  $n = 622$  non-essential genes ( $n = 2,504$  guides). We mapped essential and non-essential genes, which were derived for human cell lines, to the African green monkey genome simply by matching gene symbols. AUC = area under curve. (C) Correlation between gene enrichment in Cas9-v1 and Cas9-v2 screens. Pearson correlation is reported. (D-E) GFP-based Cas9 activity assay in Vero-E6 cells stably expressing either Cas9-v1 (D) or Cas9-v2 (E). The pXPR\_047 construct expresses GFP and an sgRNA targeting GFP; therefore, cells without Cas9 activity will express GFP, whereas cells with high Cas9 activity will knock out GFP and resemble parental cells. (F) Approach to calculate residuals from log-fold change data, using ACE2 and the 5%FBS,  $5 \times 10^6$  cells/flask, MOI 0.1 condition as an example. A natural cubic spline with four degrees of freedom is shown in blue, and a residual for each sgRNA is calculated to be the vertical distance from the fit spline.

## Figure S2

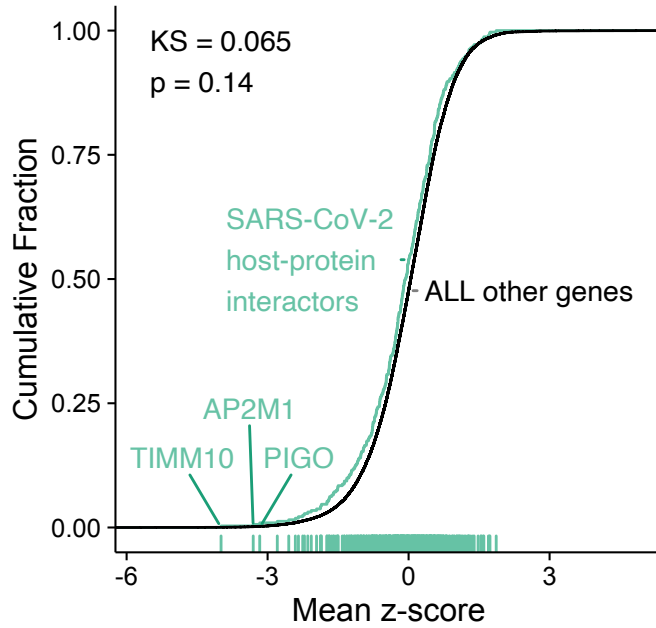

**Fig. S2. Comparison to SARS-CoV-2 protein interactome.** Cumulative distribution of mean z-scores for SARS-CoV-2 protein interactors from (7) ( $n=321$ ; green) compared with all other genes ( $n = 21,351$ ; black). Interactors with an absolute z-score greater than 3 are labelled. The KS-statistic and corresponding p-value are indicated for a two-sided KS-test. We mapped interactors to the African Green Monkey genome by matching gene symbols.

### Figure S3

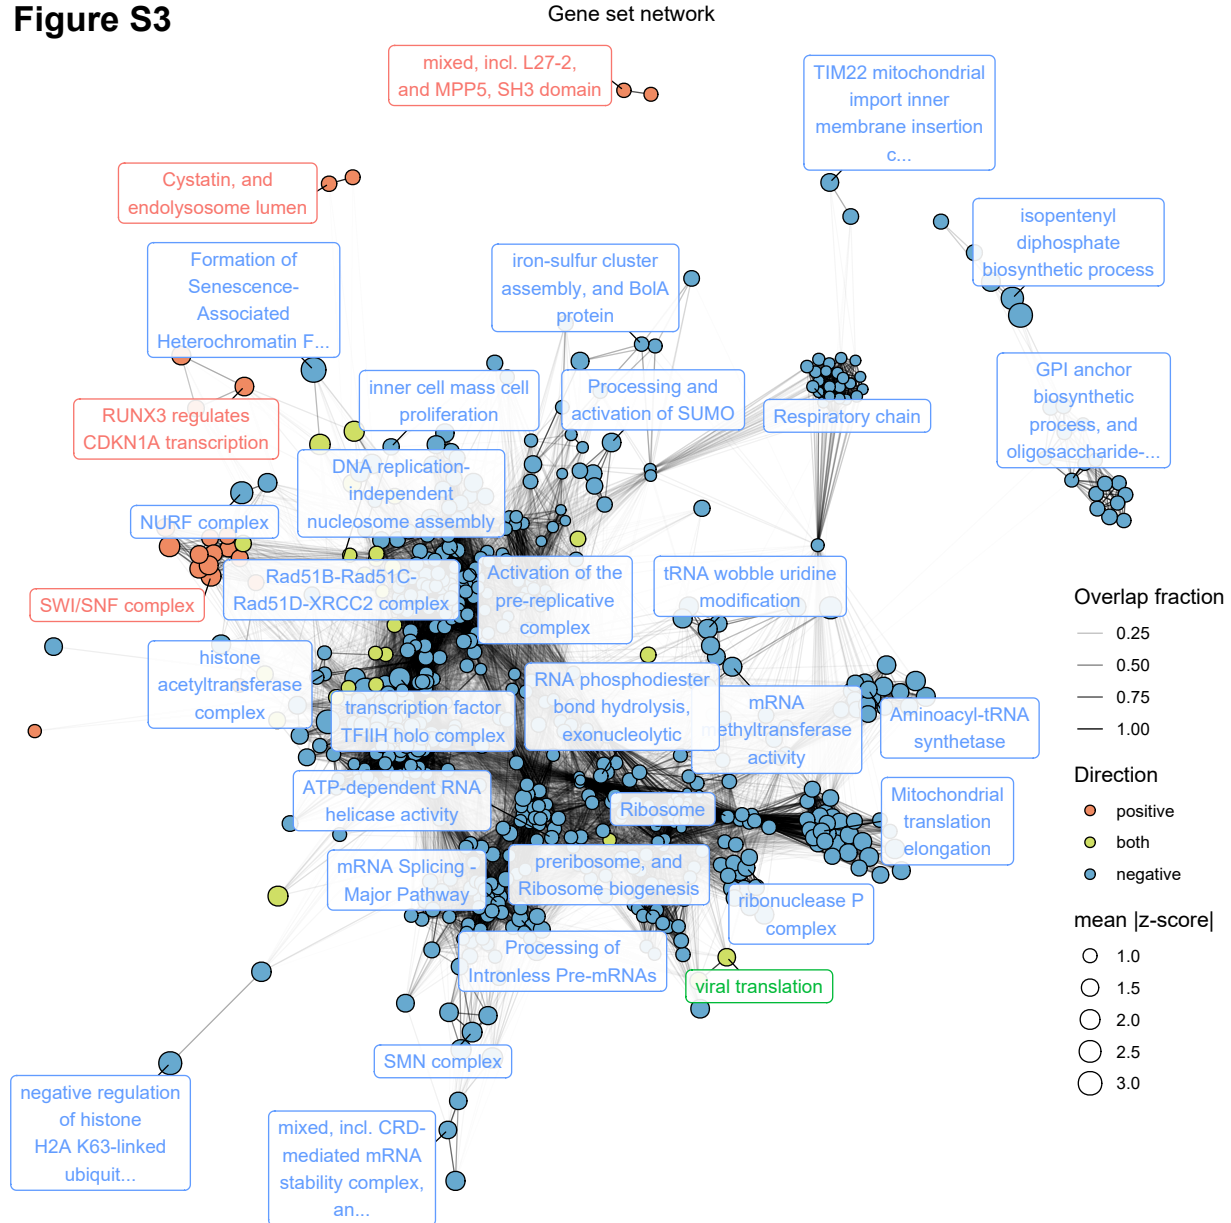

**Fig. S3. Network of gene sets.** Nodes represent significantly enriched gene sets. The size of each gene set is proportional to its mean absolute z-score. Gene sets are colored by the direction in which they score. Edges represent significant overlap between gene sets. The transparency of each edge is proportional to the fraction of genes shared by two gene sets. Gene sets were clustered using the infomap algorithm and the most central set by PageRank is labelled for each cluster. The Fruchterman–Reingold algorithm was used to lay out the network.

## Figure S4

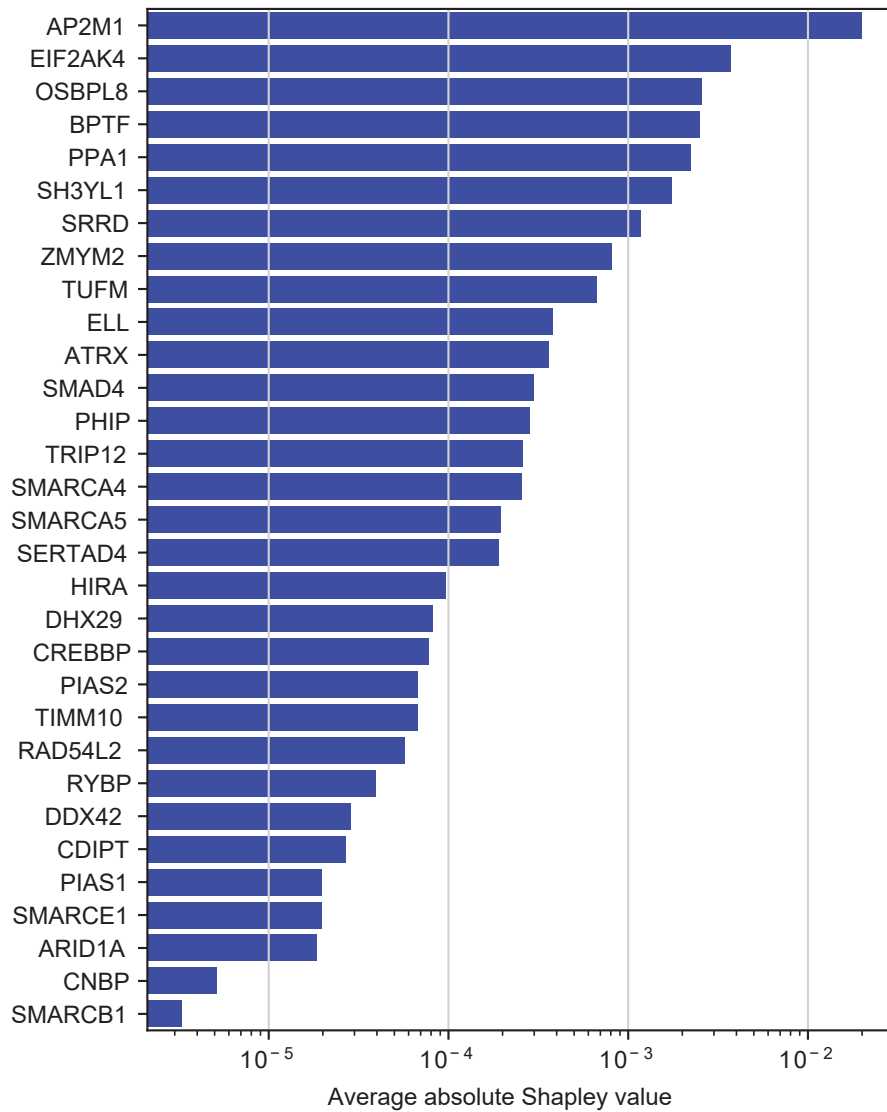

**Fig. S4. Feature importance of an infection prediction model trained on single-cell RNA sequencing analysis of infected human bronchial epithelial cells.** Genes are ranked by mean of absolute Shapley values, computed from a gradient boosting model.

**Table S1 sgRNAs for secondary validation genes**

| sgRNA name       | Target sequence       |
|------------------|-----------------------|
| ACE2 sgRNA       | CCAAAGGCGAGAGATAGTTG  |
| ACVR1B sgRNA     | AAGAGATTATTGGCAAGGGT  |
| ARID1A sgRNA #1  | CAGCAGAACTCTCACGACCA  |
| ARID1A sgRNA #2  | TTTGAATGCAAGATTGAACG  |
| ARID1A sgRNA #3  | CCTGTTGACCATACCCGCTG  |
| ATRX sgRNA #1    | TGAATTCTATACGATCAAGG  |
| ATRX sgRNA #2    | GAAAATCTCAAAAACGCGG   |
| CABIN1 sgRNA #1  | CTGGAGAACCTAACCAACGG  |
| CABIN1 sgRNA #2  | TGAAATGATAATCAGCCAGG  |
| CTSL sgRNA       | CTGGGGCCTCATAAAACAG   |
| DOLK sgRNA       | GCCAGGGTAGGACCACACCA  |
| DPF2 sgRNA #1    | GAAGATACTCCCAAGCGTCG  |
| DPF2 sgRNA #2    | TGGATGGAAAAGCGACACCG  |
| DYRK1A sgRNA #1  | TGAGAAACACCAATTTCCGA  |
| DYRK1A sgRNA #2  | TTCAACCAAAATACACCCGA  |
| DYRK1A sgRNA #3  | GAGAAACACCAATTTCCGAG  |
| HIRA sgRNA       | TGTGTGCGGTGGTCAAACAG  |
| HMGB1 sgRNA #1   | GATACTCACGGAGGCCTCTT  |
| HMGB1 sgRNA #2   | AGATACTCACGGAGGCCTCT  |
| HMGB1 sgRNA #3   | GTAAGAAGTGTGGGTTTGCT  |
| JMJD6 sgRNA #1   | CGGAACCAGAAGTTCAAGTG  |
| JMJD6 sgRNA #2   | TGAAAGACCTTACAAGCCCG  |
| KDM6A sgRNA #1   | CCTAGCAATTCAGTAACACA  |
| KDM6A sgRNA #2   | TCTTTGTATGAACAGCTGGG  |
| PCBD1 sgRNA #1   | CACTCTTGTGATGAACCCAA  |
| PCBD1 sgRNA #2   | AACTGGACCACCATCCTGAA  |
| PHF6 sgRNA #1    | CTTTATCATGCAATGCACAG  |
| PHF6 sgRNA #2    | AAAACCTGCACATAACTCCGA |
| PHIP sgRNA       | TGGCCGTGAAAATTGCAGGG  |
| PIAS1 sgRNA #1   | TAGGACTTGAATGTACGTTG  |
| PIAS2 sgRNA #1   | ATACAGTCCAAGTTCAGTTG  |
| PIAS2 sgRNA #2   | GATGTGTACAAGTCACTGCA  |
| RAD54L2 sgRNA    | TCTGATTGGTGCCAACCGAG  |
| SIAH1 sgRNA #1   | CGAAGTGTCCACCATCCCAG  |
| SIAH1 sgRNA #2   | CCCATTCTTCAATGTCAGAG  |
| SMAD3 sgRNA #1   | AGAAGCGCTCCGAATTGGAG  |
| SMAD3 sgRNA #2   | CCACCAGATGAACCACAGCA  |
| SMAD4 sgRNA      | AGTCCTACTTCCAGTCCAGG  |
| SMARCA4 sgRNA #1 | CTAGGTATGAAGTAGCTCCG  |
| SMARCA4 sgRNA #2 | ACCCCCATCCAGAAGCCGCG  |
| SMARCA4 sgRNA #3 | GCATGCTCAGAGCCACCCAG  |
| SMARCA5 sgRNA    | ATGCATCTAGTAACCAACAG  |
| SMARCE1 sgRNA    | TATGTAAGCAAGGTACGCGG  |
| TMPRSS4 sgRNA    | CCTGGCGAGTATCATATTG   |
| UBXN7 sgRNA #1   | GTGGCCGGAATAGATCTGCA  |
| UBXN7 sgRNA #2   | TCAGGTGCAAGTGAAAGTGT  |
